# Supplementary material for: Metabolite and Transcriptome Profiling Analysis Revealed That Melatonin Positively Regulates Floral Scent Production in Hedychium coronarium
Source: Front Plant Sci. 2021 Dec 17;12:808899. doi: 10.3389/fpls.2021.808899 (PMC8719004; doi:10.3389/fpls.2021.808899)
Supplement: Supplementary Table 1 — Analysis of the sequencing data statistics. [file Table_1.XLSX]

## Sheet: Table S1
Sample	Library	Raw_reads	Clean_reads	Clean_bases	Error_rate	Q20	Q30	GC_pct
CK-HS	FRAS202265610-1r	53970516	50129930	7.52G	0.02	98.38	94.74	46.04
100-HS	FRAS202265612-1r	43663340	40253842	6.04G	0.02	98.2	94.44	49.24
CK-FB	FRAS202265614-1r	44569360	42637662	6.4G	0.02	98.27	94.98	50.13
100-FB	FRAS202265616-1r	50052722	47689628	7.15G	0.02	98.28	94.98	49.47
CK-FS	FRAS202265618-1r	43469462	41574970	6.24G	0.02	98.35	95.11	49.28
100-FS	FRAS202265620-1r	44747148	42440150	6.37G	0.02	98.26	94.85	48.07

## Sheet: Table S2
sample	Total_reads	Total_map	Unique_map	Multi_map	Read1_map	Read2_map	Positive_map	Negative_map	Splice_map	Unsplice_map	Proper_map
CK-HS	50129930	47821247(95.39%)	43574448(86.92%)	4246799(8.47%)	21813315(43.51%)	21761133(43.41%)	21775638(43.44%)	21798810(43.48%)	16723767(33.36%)	26850681(53.56%)	42249892(84.28%)
100-HS	40253842	38405285(95.41%)	33775222(83.91%)	4630063(11.5%)	16910938(42.01%)	16864284(41.89%)	16875247(41.92%)	16899975(41.98%)	12440721(30.91%)	21334501(53.0%)	32664002(81.15%)
CK-FB	42637662	40496041(94.98%)	36223822(84.96%)	4272219(10.02%)	18121152(42.5%)	18102670(42.46%)	18106207(42.47%)	18117615(42.49%)	13823484(32.42%)	22400338(52.54%)	35129840(82.39%)
100-FB	47689628	45018116(94.4%)	41430713(86.88%)	3587403(7.52%)	20733852(43.48%)	20696861(43.4%)	20698447(43.4%)	20732266(43.47%)	14960400(31.37%)	26470313(55.51%)	40206338(84.31%)
CK-FS	41574970	39498411(95.01%)	36697917(88.27%)	2800494(6.74%)	18360903(44.16%)	18337014(44.11%)	18341389(44.12%)	18356528(44.15%)	13213277(31.78%)	23484640(56.49%)	35635856(85.71%)
100-FS	42440150	40555444(95.56%)	35671757(84.05%)	4883687(11.51%)	17858729(42.08%)	17813028(41.97%)	17836711(42.03%)	17835046(42.02%)	13936429(32.84%)	21735328(51.21%)	34565744(81.45%)

## Sheet: Table S3
Category	GOID	Description	GeneRatio	BgRatio	pvalue	padj	geneID	geneName	Count	Up	Up_Gene_id	Down	Down_Gene_id
BP	GO:0006457	protein folding	21/510	137/9604	1.01251e-05	0.0030274	evm.TU.scaf_158.9/evm.TU.scaf_14.27/evm.TU.scaf_408.4/evm.TU.scaf_25.110/evm.TU.scaf_197.83/evm.TU.scaf_548.24/evm.TU.scaf_141.6/evm.TU.scaf_67.38/evm.TU.scaf_38.112/evm.TU.scaf_123.7/evm.TU.scaf_132.30/evm.TU.scaf_621.17/evm.TU.scaf_533.26/evm.TU.scaf_68.14/evm.TU.scaf_870.12/evm.TU.scaf_3.329/evm.TU.scaf_25.109/evm.TU.scaf_253.148/evm.TU.scaf_277.55/evm.TU.scaf_197.69/evm.TU.scaf_662.5	EVM%20prediction%20scaf_158.9/EVM%20prediction%20scaf_14.27/EVM%20prediction%20scaf_408.4/EVM%20prediction%20scaf_25.110/EVM%20prediction%20scaf_197.83/EVM%20prediction%20scaf_548.24/EVM%20prediction%20scaf_141.6/EVM%20prediction%20scaf_67.38/EVM%20prediction%20scaf_38.112/EVM%20prediction%20scaf_123.7/EVM%20prediction%20scaf_132.30/EVM%20prediction%20scaf_621.17/EVM%20prediction%20scaf_533.26/EV…	21	21	evm.TU.scaf_158.9/evm.TU.scaf_14.27/evm.TU.scaf_408.4/evm.TU.scaf_25.110/evm.TU.scaf_197.83/evm.TU.scaf_548.24/evm.TU.scaf_141.6/evm.TU.scaf_67.38/evm.TU.scaf_38.112/evm.TU.scaf_123.7/evm.TU.scaf_132.30/evm.TU.scaf_621.17/evm.TU.scaf_533.26/evm.TU.scaf_68.14/evm.TU.scaf_870.12/evm.TU.scaf_3.329/evm.TU.scaf_25.109/evm.TU.scaf_253.148/evm.TU.scaf_277.55/evm.TU.scaf_197.69/evm.TU.scaf_662.5	0
BP	GO:0006629	lipid metabolic process	36/510	386/9604	0.00067066	0.100264	evm.TU.scaf_293.53/evm.TU.scaf_3.51/novel.285/evm.TU.scaf_47.146/evm.TU.scaf_64.36/evm.TU.scaf_1101.6/evm.TU.scaf_152.112/evm.TU.scaf_322.1/evm.TU.scaf_827.34/evm.TU.scaf_840.1/evm.TU.scaf_827.38/evm.TU.scaf_593.24/evm.TU.scaf_716.19/evm.TU.scaf_463.31/evm.TU.scaf_25.72/evm.TU.scaf_206.57/evm.TU.scaf_243.35/evm.TU.scaf_463.46/evm.TU.scaf_189.59/evm.TU.scaf_665.42/evm.TU.scaf_197.22/evm.TU.scaf_87…	EVM%20prediction%20scaf_293.53/EVM%20prediction%20scaf_3.51/-/EVM%20prediction%20scaf_47.146/EVM%20prediction%20scaf_64.36/EVM%20prediction%20scaf_1101.6/EVM%20prediction%20scaf_152.112/EVM%20prediction%20scaf_322.1/EVM%20prediction%20scaf_827.34/EVM%20prediction%20scaf_840.1/EVM%20prediction%20scaf_827.38/EVM%20prediction%20scaf_593.24/EVM%20prediction%20scaf_716.19/EVM%20prediction%20scaf_463.3…	36	32	evm.TU.scaf_293.53/evm.TU.scaf_3.51/novel.285/evm.TU.scaf_47.146/evm.TU.scaf_64.36/evm.TU.scaf_1101.6/evm.TU.scaf_152.112/evm.TU.scaf_322.1/evm.TU.scaf_827.34/evm.TU.scaf_840.1/evm.TU.scaf_827.38/evm.TU.scaf_593.24/evm.TU.scaf_716.19/evm.TU.scaf_463.31/evm.TU.scaf_206.57/evm.TU.scaf_243.35/evm.TU.scaf_463.46/evm.TU.scaf_189.59/evm.TU.scaf_665.42/evm.TU.scaf_197.22/evm.TU.scaf_87.90/evm.TU.scaf_35…	4	evm.TU.scaf_25.72/evm.TU.scaf_796.4/evm.TU.scaf_122.19/evm.TU.scaf_77.31
BP	GO:0000097	sulfur amino acid biosynthetic process	4/510	11/9604	0.00192256	0.191615	evm.TU.scaf_395.121/evm.TU.scaf_548.37/evm.TU.scaf_253.143/evm.TU.scaf_3.321	EVM%20prediction%20scaf_395.121/EVM%20prediction%20scaf_548.37/EVM%20prediction%20scaf_253.143/EVM%20prediction%20scaf_3.321	4	1	evm.TU.scaf_395.121	3	evm.TU.scaf_548.37/evm.TU.scaf_253.143/evm.TU.scaf_3.321
BP	GO:0000096	sulfur amino acid metabolic process	4/510	14/9604	0.00513453	0.383806	evm.TU.scaf_395.121/evm.TU.scaf_548.37/evm.TU.scaf_253.143/evm.TU.scaf_3.321	EVM%20prediction%20scaf_395.121/EVM%20prediction%20scaf_548.37/EVM%20prediction%20scaf_253.143/EVM%20prediction%20scaf_3.321	4	1	evm.TU.scaf_395.121	3	evm.TU.scaf_548.37/evm.TU.scaf_253.143/evm.TU.scaf_3.321
BP	GO:0042737	drug catabolic process	4/510	18/9604	0.0132608	0.625332	evm.TU.scaf_275.107/evm.TU.scaf_168.27/novel.1786/evm.TU.scaf_189.82	EVM%20prediction%20scaf_275.107/EVM%20prediction%20scaf_168.27/-/EVM%20prediction%20scaf_189.82	4	3	evm.TU.scaf_275.107/evm.TU.scaf_168.27/novel.1786	1	evm.TU.scaf_189.82
BP	GO:0008610	lipid biosynthetic process	16/510	168/9604	0.0167242	0.625332	evm.TU.scaf_293.53/novel.285/evm.TU.scaf_64.36/evm.TU.scaf_152.112/evm.TU.scaf_840.1/evm.TU.scaf_593.24/evm.TU.scaf_716.19/evm.TU.scaf_25.72/evm.TU.scaf_206.57/evm.TU.scaf_665.42/evm.TU.scaf_197.22/evm.TU.scaf_87.90/evm.TU.scaf_326.36/evm.TU.scaf_55.84/evm.TU.scaf_503.25/evm.TU.scaf_77.31	EVM%20prediction%20scaf_293.53/-/EVM%20prediction%20scaf_64.36/EVM%20prediction%20scaf_152.112/EVM%20prediction%20scaf_840.1/EVM%20prediction%20scaf_593.24/EVM%20prediction%20scaf_716.19/EVM%20prediction%20scaf_25.72/EVM%20prediction%20scaf_206.57/EVM%20prediction%20scaf_665.42/EVM%20prediction%20scaf_197.22/EVM%20prediction%20scaf_87.90/EVM%20prediction%20scaf_326.36/EVM%20prediction%20scaf_55.8…	16	14	evm.TU.scaf_293.53/novel.285/evm.TU.scaf_64.36/evm.TU.scaf_152.112/evm.TU.scaf_840.1/evm.TU.scaf_593.24/evm.TU.scaf_716.19/evm.TU.scaf_206.57/evm.TU.scaf_665.42/evm.TU.scaf_197.22/evm.TU.scaf_87.90/evm.TU.scaf_326.36/evm.TU.scaf_55.84/evm.TU.scaf_503.25	2	evm.TU.scaf_25.72/evm.TU.scaf_77.31
BP	GO:0009067	aspartate family amino acid biosynthetic process	3/510	12/9604	0.0228644	0.625332	evm.TU.scaf_548.37/evm.TU.scaf_253.143/evm.TU.scaf_3.321	EVM%20prediction%20scaf_548.37/EVM%20prediction%20scaf_253.143/EVM%20prediction%20scaf_3.321	3	0		3	evm.TU.scaf_548.37/evm.TU.scaf_253.143/evm.TU.scaf_3.321
BP	GO:0016567	protein ubiquitination	9/510	80/9604	0.0254075	0.625332	evm.TU.scaf_361.61/evm.TU.scaf_128.124/evm.TU.scaf_441.35/evm.TU.scaf_812.41/evm.TU.scaf_295.46/evm.TU.scaf_277.35/evm.TU.scaf_96.180/evm.TU.scaf_308.45/evm.TU.scaf_402.16	EVM%20prediction%20scaf_361.61/EVM%20prediction%20scaf_128.124/EVM%20prediction%20scaf_441.35/EVM%20prediction%20scaf_812.41/EVM%20prediction%20scaf_295.46/EVM%20prediction%20scaf_277.35/EVM%20prediction%20scaf_96.180/EVM%20prediction%20scaf_308.45/EVM%20prediction%20scaf_402.16	9	8	evm.TU.scaf_361.61/evm.TU.scaf_128.124/evm.TU.scaf_441.35/evm.TU.scaf_812.41/evm.TU.scaf_295.46/evm.TU.scaf_277.35/evm.TU.scaf_308.45/evm.TU.scaf_402.16	1	evm.TU.scaf_96.180
BP	GO:0006633	fatty acid biosynthetic process	8/510	69/9604	0.0290675	0.625332	evm.TU.scaf_293.53/novel.285/evm.TU.scaf_64.36/evm.TU.scaf_152.112/evm.TU.scaf_840.1/evm.TU.scaf_665.42/evm.TU.scaf_87.90/evm.TU.scaf_326.36	EVM%20prediction%20scaf_293.53/-/EVM%20prediction%20scaf_64.36/EVM%20prediction%20scaf_152.112/EVM%20prediction%20scaf_840.1/EVM%20prediction%20scaf_665.42/EVM%20prediction%20scaf_87.90/EVM%20prediction%20scaf_326.36	8	8	evm.TU.scaf_293.53/novel.285/evm.TU.scaf_64.36/evm.TU.scaf_152.112/evm.TU.scaf_840.1/evm.TU.scaf_665.42/evm.TU.scaf_87.90/evm.TU.scaf_326.36	0
BP	GO:0032446	protein modification by small protein conjugation	9/510	82/9604	0.0292783	0.625332	evm.TU.scaf_361.61/evm.TU.scaf_128.124/evm.TU.scaf_441.35/evm.TU.scaf_812.41/evm.TU.scaf_295.46/evm.TU.scaf_277.35/evm.TU.scaf_96.180/evm.TU.scaf_308.45/evm.TU.scaf_402.16	EVM%20prediction%20scaf_361.61/EVM%20prediction%20scaf_128.124/EVM%20prediction%20scaf_441.35/EVM%20prediction%20scaf_812.41/EVM%20prediction%20scaf_295.46/EVM%20prediction%20scaf_277.35/EVM%20prediction%20scaf_96.180/EVM%20prediction%20scaf_308.45/EVM%20prediction%20scaf_402.16	9	8	evm.TU.scaf_361.61/evm.TU.scaf_128.124/evm.TU.scaf_441.35/evm.TU.scaf_812.41/evm.TU.scaf_295.46/evm.TU.scaf_277.35/evm.TU.scaf_308.45/evm.TU.scaf_402.16	1	evm.TU.scaf_96.180
BP	GO:0009066	aspartate family amino acid metabolic process	3/510	14/9604	0.0349689	0.625332	evm.TU.scaf_548.37/evm.TU.scaf_253.143/evm.TU.scaf_3.321	EVM%20prediction%20scaf_548.37/EVM%20prediction%20scaf_253.143/EVM%20prediction%20scaf_3.321	3	0		3	evm.TU.scaf_548.37/evm.TU.scaf_253.143/evm.TU.scaf_3.321
BP	GO:0006026	aminoglycan catabolic process	3/510	15/9604	0.0420332	0.625332	evm.TU.scaf_275.107/evm.TU.scaf_168.27/novel.1786	EVM%20prediction%20scaf_275.107/EVM%20prediction%20scaf_168.27/-	3	3	evm.TU.scaf_275.107/evm.TU.scaf_168.27/novel.1786	0
BP	GO:0006030	chitin metabolic process	3/510	15/9604	0.0420332	0.625332	evm.TU.scaf_275.107/evm.TU.scaf_168.27/novel.1786	EVM%20prediction%20scaf_275.107/EVM%20prediction%20scaf_168.27/-	3	3	evm.TU.scaf_275.107/evm.TU.scaf_168.27/novel.1786	0
BP	GO:0006032	chitin catabolic process	3/510	15/9604	0.0420332	0.625332	evm.TU.scaf_275.107/evm.TU.scaf_168.27/novel.1786	EVM%20prediction%20scaf_275.107/EVM%20prediction%20scaf_168.27/-	3	3	evm.TU.scaf_275.107/evm.TU.scaf_168.27/novel.1786	0
BP	GO:0006040	amino sugar metabolic process	3/510	15/9604	0.0420332	0.625332	evm.TU.scaf_275.107/evm.TU.scaf_168.27/novel.1786	EVM%20prediction%20scaf_275.107/EVM%20prediction%20scaf_168.27/-	3	3	evm.TU.scaf_275.107/evm.TU.scaf_168.27/novel.1786	0
BP	GO:0016998	cell wall macromolecule catabolic process	3/510	15/9604	0.0420332	0.625332	evm.TU.scaf_275.107/evm.TU.scaf_168.27/novel.1786	EVM%20prediction%20scaf_275.107/EVM%20prediction%20scaf_168.27/-	3	3	evm.TU.scaf_275.107/evm.TU.scaf_168.27/novel.1786	0
BP	GO:0044036	cell wall macromolecule metabolic process	3/510	15/9604	0.0420332	0.625332	evm.TU.scaf_275.107/evm.TU.scaf_168.27/novel.1786	EVM%20prediction%20scaf_275.107/EVM%20prediction%20scaf_168.27/-	3	3	evm.TU.scaf_275.107/evm.TU.scaf_168.27/novel.1786	0
BP	GO:0046348	amino sugar catabolic process	3/510	15/9604	0.0420332	0.625332	evm.TU.scaf_275.107/evm.TU.scaf_168.27/novel.1786	EVM%20prediction%20scaf_275.107/EVM%20prediction%20scaf_168.27/-	3	3	evm.TU.scaf_275.107/evm.TU.scaf_168.27/novel.1786	0
BP	GO:1901071	glucosamine-containing compound metabolic process	3/510	15/9604	0.0420332	0.625332	evm.TU.scaf_275.107/evm.TU.scaf_168.27/novel.1786	EVM%20prediction%20scaf_275.107/EVM%20prediction%20scaf_168.27/-	3	3	evm.TU.scaf_275.107/evm.TU.scaf_168.27/novel.1786	0
BP	GO:1901072	glucosamine-containing compound catabolic process	3/510	15/9604	0.0420332	0.625332	evm.TU.scaf_275.107/evm.TU.scaf_168.27/novel.1786	EVM%20prediction%20scaf_275.107/EVM%20prediction%20scaf_168.27/-	3	3	evm.TU.scaf_275.107/evm.TU.scaf_168.27/novel.1786	0
BP	GO:0005976	polysaccharide metabolic process	10/510	102/9604	0.0439197	0.625332	evm.TU.scaf_189.91/evm.TU.scaf_106.13/evm.TU.scaf_345.25/evm.TU.scaf_121.125/evm.TU.scaf_345.26/evm.TU.scaf_114.4/evm.TU.scaf_38.1/evm.TU.scaf_47.18/evm.TU.scaf_46.17/evm.TU.scaf_408.112	EVM%20prediction%20scaf_189.91/EVM%20prediction%20scaf_106.13/EVM%20prediction%20scaf_345.25/EVM%20prediction%20scaf_121.125/EVM%20prediction%20scaf_345.26/EVM%20prediction%20scaf_114.4/EVM%20prediction%20scaf_38.1/EVM%20prediction%20scaf_47.18/EVM%20prediction%20scaf_46.17/EVM%20prediction%20scaf_408.112	10	6	evm.TU.scaf_189.91/evm.TU.scaf_106.13/evm.TU.scaf_121.125/evm.TU.scaf_114.4/evm.TU.scaf_46.17/evm.TU.scaf_408.112	4	evm.TU.scaf_345.25/evm.TU.scaf_345.26/evm.TU.scaf_38.1/evm.TU.scaf_47.18
BP	GO:0000272	polysaccharide catabolic process	3/510	16/9604	0.0497533	0.676192	evm.TU.scaf_106.13/evm.TU.scaf_121.125/evm.TU.scaf_114.4	EVM%20prediction%20scaf_106.13/EVM%20prediction%20scaf_121.125/EVM%20prediction%20scaf_114.4	3	3	evm.TU.scaf_106.13/evm.TU.scaf_121.125/evm.TU.scaf_114.4	0
BP	GO:0044272	sulfur compound biosynthetic process	4/510	27/9604	0.0523166	0.680115	evm.TU.scaf_395.121/evm.TU.scaf_548.37/evm.TU.scaf_253.143/evm.TU.scaf_3.321	EVM%20prediction%20scaf_395.121/EVM%20prediction%20scaf_548.37/EVM%20prediction%20scaf_253.143/EVM%20prediction%20scaf_3.321	4	1	evm.TU.scaf_395.121	3	evm.TU.scaf_548.37/evm.TU.scaf_253.143/evm.TU.scaf_3.321
BP	GO:0006631	fatty acid metabolic process	8/510	87/9604	0.0901136	1	evm.TU.scaf_293.53/novel.285/evm.TU.scaf_64.36/evm.TU.scaf_152.112/evm.TU.scaf_840.1/evm.TU.scaf_665.42/evm.TU.scaf_87.90/evm.TU.scaf_326.36	EVM%20prediction%20scaf_293.53/-/EVM%20prediction%20scaf_64.36/EVM%20prediction%20scaf_152.112/EVM%20prediction%20scaf_840.1/EVM%20prediction%20scaf_665.42/EVM%20prediction%20scaf_87.90/EVM%20prediction%20scaf_326.36	8	8	evm.TU.scaf_293.53/novel.285/evm.TU.scaf_64.36/evm.TU.scaf_152.112/evm.TU.scaf_840.1/evm.TU.scaf_665.42/evm.TU.scaf_87.90/evm.TU.scaf_326.36	0
BP	GO:0008299	isoprenoid biosynthetic process	5/510	46/9604	0.0952683	1	evm.TU.scaf_716.19/evm.TU.scaf_25.72/evm.TU.scaf_206.57/evm.TU.scaf_55.84/evm.TU.scaf_77.31	EVM%20prediction%20scaf_716.19/EVM%20prediction%20scaf_25.72/EVM%20prediction%20scaf_206.57/EVM%20prediction%20scaf_55.84/EVM%20prediction%20scaf_77.31	5	3	evm.TU.scaf_716.19/evm.TU.scaf_206.57/evm.TU.scaf_55.84	2	evm.TU.scaf_25.72/evm.TU.scaf_77.31
BP	GO:0000041	transition metal ion transport	2/510	10/9604	0.09548	1	evm.TU.scaf_154.59/evm.TU.scaf_107.62	EVM%20prediction%20scaf_154.59/EVM%20prediction%20scaf_107.62	2	2	evm.TU.scaf_154.59/evm.TU.scaf_107.62	0
BP	GO:0009069	serine family amino acid metabolic process	2/510	10/9604	0.09548	1	evm.TU.scaf_395.121/evm.TU.scaf_189.82	EVM%20prediction%20scaf_395.121/EVM%20prediction%20scaf_189.82	2	1	evm.TU.scaf_395.121	1	evm.TU.scaf_189.82
BP	GO:0006022	aminoglycan metabolic process	3/510	21/9604	0.0973996	1	evm.TU.scaf_275.107/evm.TU.scaf_168.27/novel.1786	EVM%20prediction%20scaf_275.107/EVM%20prediction%20scaf_168.27/-	3	3	evm.TU.scaf_275.107/evm.TU.scaf_168.27/novel.1786	0
BP	GO:0006720	isoprenoid metabolic process	5/510	48/9604	0.109421	1	evm.TU.scaf_716.19/evm.TU.scaf_25.72/evm.TU.scaf_206.57/evm.TU.scaf_55.84/evm.TU.scaf_77.31	EVM%20prediction%20scaf_716.19/EVM%20prediction%20scaf_25.72/EVM%20prediction%20scaf_206.57/EVM%20prediction%20scaf_55.84/EVM%20prediction%20scaf_77.31	5	3	evm.TU.scaf_716.19/evm.TU.scaf_206.57/evm.TU.scaf_55.84	2	evm.TU.scaf_25.72/evm.TU.scaf_77.31

## Sheet: Table S4
KEGGID	Pathway		DEGs with pathway annotation	Upregulated DEGs	Downregulated DEGs	p value
CK-HS vs 100-HS
mus04141	Protein processing in endoplasmic reticulum		22	21	1	4.35855e-08
mus00905	Brassinosteroid biosynthesis		3	3	0	0.00535118
mus00630	Glyoxylate and dicarboxylate metabolism		7	6	1	0.00596966
mus04075	Plant hormone signal transduction		14	12	2	0.00872554
mus00380	Tryptophan metabolism		4	4	0	0.0137428
mus00062	Fatty acid elongation		4	4	0	0.0179781
mus00730	Thiamine metabolism		3	3	0	0.0291114
mus04016	MAPK signaling pathway - plant		9	9	0	0.0330886
mus00906	Carotenoid biosynthesis		3	2	1	0.0612226
mus00300	Lysine biosynthesis		2	0	2	0.0633942
mus00591	Linoleic acid metabolism		2	1	1	0.074218
mus04626	Plant-pathogen interaction		12	12	0	0.0772115
mus00950	Isoquinoline alkaloid biosynthesis		2	2	0	0.0855803
mus00480	Glutathione metabolism		5	5	0	0.0953602
mus01200	Carbon metabolism		12	10	2	0.116151
mus00071	Fatty acid degradation		3	3	0	0.12935
mus00640	Propanoate metabolism		3	3	0	0.156239
mus00260	Glycine, serine and threonine metabolism		4	3	1	0.163546
mus00410	beta-Alanine metabolism		3	3	0	0.175051
mus00960	Tropane, piperidine and pyridine alkaloid biosynthesis		2	2	0	0.17589
Ck-FB vs 100-FB
mus00940	Phenylpropanoid biosynthesis		14	12	2	7.43955e-07
mus00520	Amino sugar and nucleotide sugar metabolism		13	9	4	0.000189189
mus00051	Fructose and mannose metabolism		8	5	3	0.000729926
mus04626	Plant-pathogen interaction		16	15	1	0.00214231
mus00040	Pentose and glucuronate interconversions		6	5	1	0.00444349
mus04075	Plant hormone signal transduction		14	10	4	0.00542482
mus00500	Starch and sucrose metabolism		10	9	1	0.00548559
mus04016	MAPK signaling pathway - plant		10	9	1	0.00991879
mus00062	Fatty acid elongation		4	4	0	0.0155154
mus00052	Galactose metabolism		5	4	1	0.027492
mus04130	SNARE interactions in vesicular transport		3	3	0	0.107905
mus00460	Cyanoamino acid metabolism		2	2	0	0.19268
mus00906	Carotenoid biosynthesis		2	2	0	0.19268
mus00100	Steroid biosynthesis		2	1	1	0.231812
mus00910	Nitrogen metabolism		2	2	0	0.258182
mus00053	Ascorbate and aldarate metabolism		3	3	0	0.275535
mus00710	Carbon fixation in photosynthetic organisms		3	3	0	0.275535
mus00130	Ubiquinone and other terpenoid-quinone biosynthesis		2	2	0	0.350028
mus00950	Isoquinoline alkaloid biosynthesis		1	1	0	0.372415
mus00330	Arginine and proline metabolism		2	2	0	0.388364
CK-FS vs 100-FS
mus00040	Pentose and glucuronate interconversions		9	1	8	7.2026e-05
mus04626	Plant-pathogen interaction		22	2	20	0.000111026
mus00280	Valine, leucine and isoleucine degradation		7	1	6	0.00195683
mus00250	Alanine, aspartate and glutamate metabolism		7	0	7	0.00262073
mus04016	MAPK signaling pathway - plant		13	3	10	0.00348991
mus00520	Amino sugar and nucleotide sugar metabolism		12	2	10	0.00721445
mus00053	Ascorbate and aldarate metabolism		7	0	7	0.00979974
mus00270	Cysteine and methionine metabolism		10	0	10	0.0164011
mus00290	Valine, leucine and isoleucine biosynthesis		3	0	3	0.0287514
mus00460	Cyanoamino acid metabolism		4	0	4	0.0290403
mus00910	Nitrogen metabolism		4	0	4	0.0370604
mus00940	Phenylpropanoid biosynthesis		8	1	7	0.0420175
mus00052	Galactose metabolism		5	2	3	0.0576084
mus00900	Terpenoid backbone biosynthesis		4	1	3	0.0942142
mus00906	Carotenoid biosynthesis		3	1	2	0.0949007
mus00100	Steroid biosynthesis		3	0	3	0.10437
mus00500	Starch and sucrose metabolism		8	2	6	0.135266
mus04070	Phosphatidylinositol signaling system		5	0	5	0.139001
mus01230	Biosynthesis of amino acids		12	0	12	0.155994
mus00920	Sulfur metabolism		3	0	3	0.156642

## Sheet: Table S5
Gene	GENE ID	F	R
TPS	evm.TU.scaf_625.34	TAAGTCAGCCGAATATCACCC	ACTCGCTCTTTTAACTCTTCCAC
TPS	evm.TU.scaf_625.43	TCAAGTCGATCGTCACAC	ATGAAATAGTCACCCCAAA
TPS	evm.TU.scaf_625.40	GAAGAAAACCACATTCCCCAT	AAGCACTCCAATTCCCTCAAG
TPS	evm.TU.scaf_457.3	TATCTCTTTGGTGCTGGT	CTCACACTGTAATGGTTGC
TPS	evm.TU.scaf_636.15	GAAGCAATCAACCATCCT	ATCGCCCCAAATACTCG
GGPS	evm.TU.scaf_206.57	CGCCAACCGCCACAACTGAA	AAGGGGGGAAAAACCCCACA
PAL	evm.TU.scaf_488.19	TCATGTCGGCGACCTACTT	GCCTTCACCGCGTGTTTT
HCT	evm.TU.scaf_93.4	GCAAAGGACCAACAGCAA	ATATCGACAGCCCACCAA
HAT	evm.TU.scaf_441.31	ACTGCACTCTCACAGCAGT	GGGTTTGAAAGTCACACAC
DXS	evm.TU.scaf_47.166	CTGCCAAGCTCCATTCCTCA	ATTAATCTTCCACCCGCCCA
DXS	evm.TU.scaf_597.1	CATTCTCCTTCTCGTGTCA	TCTGCTGTGCTCTTGCTG
BSMT	evm.TU.scaf_68.69	TACGGCCATTGACGCATACAGA	CGAATTGGAAGCGTAGCTAGTT
MYB	evm.TU.scaf_868.35	ACATTCTACCTACTGCTCCACG	CCACTTCTTCTTTTTTTCCCC
MYB	evm.TU.scaf_36.2	TCTCAAGATGCGAGTCACCT	ATCCCCTTCAGCTCTAACAA
MYB	evm.TU.scaf_25.144	GGGTACAAATGCAAATGCGTG	AACTATAATTACTGGGGCGGGC
MYB	evm.TU.scaf_1021.25	TTTAGCTTGCAGGACACCAGTACC	CATTCCCTTACGCTGAACTCCA
MYB	evm.TU.scaf_1077.31	CACCGGCTATTGCCTGTC	CGGCTTAGTGCGTTCATC
bHLH	evm.TU.scaf_180.51	CCCCAGTGCCAAATGATTA	ATACCGTCCTGCCAGAGTC
bHLH	evm.TU.scaf_621.25	GTAAGGCACCAGGATTCCA	TTTTTCACCCACAACAGAGA
